# Supplementary material for: Characterization of bacterial community changes and antibiotic resistance genes in lamb manure of different incidence
Source: PubMed Central journal article supplement (PMC6625992; doi:10.1038/s41598-019-46604-y), 2019-07-12
Supplement: 41598_2019_46604_MOESM1_ESM.pdf [file 41598_2019_46604_MOESM1_ESM.pdf]

1 Characterization of bacterial community changes and antibiotic resistance  
2 genes in lamb manure of different incidence

3

4 Ling-cong KONG<sup>1¶</sup>, Bo WANG<sup>1¶</sup>, Yi-ming WANG<sup>1</sup>, Ren-ge HU<sup>1</sup>, AtiahLujia Atiewin<sup>1</sup>,  
5 Duo GAO<sup>2</sup>, Yun-hang GAO<sup>1\*</sup> and Hong-xia MA<sup>1,3\*</sup>

6

7 <sup>1</sup> Department of Basic Veterinary Medicine, College of Animal Science and Technology,  
8 Jilin Agricultural University, Changchun, China.

9 <sup>2</sup> Liaoning Testing & Inspection Center for Quality & Safety of Veterinary Drugs,  
10 Feed and Livestock Products, Liaoning, China.

11 <sup>3</sup>The Key Laboratory of Animal Production, Product Quality and Security, Ministry of  
12 Education, Jilin Agricultural University, Changchun, China.

13 \*Corresponding author:

14 Hong-Xia MA

15 College of Animal Science and Technology, Jilin Agricultural University, Xincheng  
16 Street No.#2888, Changchun 130118, P.R. China

17 E-mail: hongxia0731001@163.com

18 Yun-HangGAO

19 College of Animal Science and Technology, Jilin Agricultural University, Xincheng  
20 Street No.#2888, Changchun 130118, P.R. China

21 E-mail: gaoyunhang@163.com

22 ¶These authors contributed equally

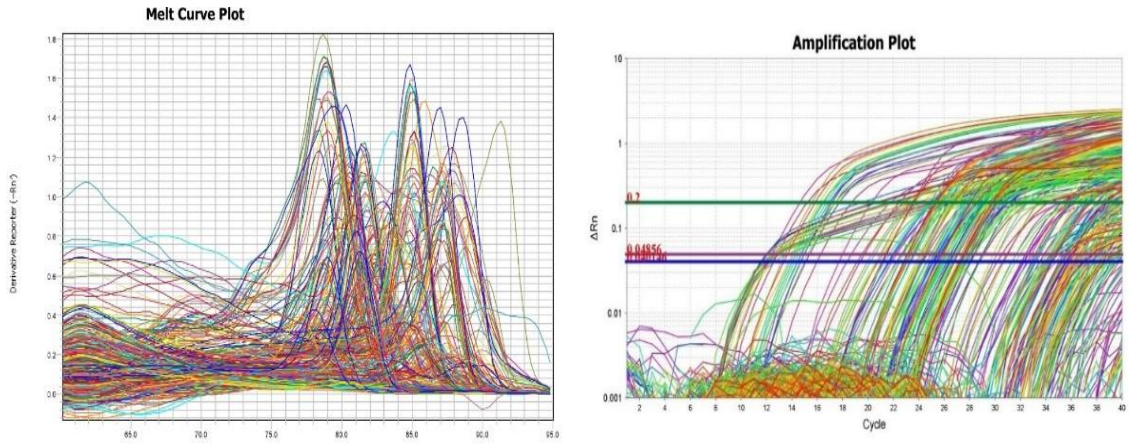

Fig.S1 Amplificationcurve and Meltcurve ofresistance gene

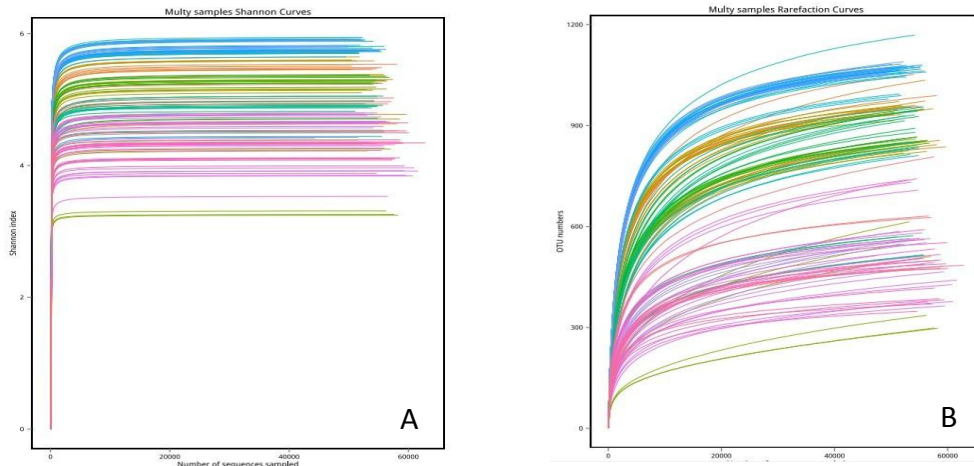

Fig. S2 A: Shannon Indexcurve ; B: Dilution curve

Table S1 Primer sequence of resistance gene

| Gene classification | Genes          | Sequence ( 5'—3')                |                                   |
|---------------------|----------------|----------------------------------|-----------------------------------|
| Aminoglycosid e     | aacC(6')I<br>1 | GACCGGATTAAGGCCGATG              | CTTGCCTTGATATTCAGTTTTTATAAC<br>CA |
|                     | aacC2          | ACGGCATTCTCGATTGCTTT             | CCGAGCTTCACGTAAGCATTT             |
|                     | aacC4          | CGGCGTGGGACACGAT                 | AGGGAACCTTTGCCATCACT              |
|                     | strA           | CCGGTGGCATTGAGAAAAA              | GTGGCTCAACCTGCGAAAAG              |
|                     | strB           | GCTCGGTCGTGAGAACAATCT            | CAATTCGGTCGCTGGTAGT               |
| Beta Lactamase      | blaSHV         | CTTCCCATGATGAGCACCTTT            | TCCTGCTGGCGATAGTGGAT              |
|                     | blaCTX-<br>M   | GGAGGCGTGACGGCTTTT               | TTCAGTGCATCCAGACGAA               |
|                     | blaTEM         | AGCATCTTACGGATGGCATGA            | TCCTCCGATCGTTGTCAGAAGT            |
|                     | tetB           | AGTGCGCTTTGGATGCTGTA             | AGCCCCAGTAGCTCCTGTGA              |
|                     | tetC           | ACTGGTAAGGTAAACGCCATTGTC         | ATGCATAAACCCAGCCATTGAGTAAG        |
| Tetracycline        | tetE           | TTGGCGCTGTATGCAATGAT             | CGACGACCTATGCGATCTGA              |
|                     | tetO           | ATGTGGATACTACAACGCATGAGATT       | TGCCTCCACATGATATTTTTCT            |
|                     | tetQ           | CGCCTCAGAAGTAAGTTCATACACTA<br>AG | TCGTTTCATGCGGATATTATCAGAAT        |
|                     | ermA           | TTGAGAAGGGATTGCGAAAAG            | ATATCCATCTCCACCATTAATAGTAAACC     |
|                     | ermB           | TAAAGGGCATTAAACGACGAAACT         | TTTATACCTCTGTTTGTAGGGAATTGAA      |
| MLSB                | ermC           | TTTGAAATCGGCTCAGAAAAA            | ATGGTCTATTTCAATGGCAGTTACG         |
|                     | mphA           | CTGACGCGCTCCGTGTT                | GGTGGTGCATGGCGATCT                |
|                     | mphB           | CGCAGCGCTTGATCTTGTAG             | TTACTGCATCCATACGCTGCTT            |
| Sulfonamide         | sul1           | CAGCGCTATGCGCTCAAG               | ATCCCCTGCGCTGAGT                  |
|                     | sul2           | TCATCTGCCAAACTCGTCGTTA           | GTCAAAGAACGCCGCAATGT              |
| Quinolone           | qnrA           | AGGATTCTCAGCCAGGATT              | CCGCTTTCAATGAAACTGCAA             |
|                     | qnrS           | GTGAGTAATCGTATGTACTTTTGC         | AAACACCTCGACTTAAGTCT              |
|                     | intI1          | CGAACGAGTGGCGGAGGGTG             | TACCCGAGAGCTTGGCACCCA             |
| Others              | MCR-1          | CGGTCAGTCCGTTTGTTC               | CTTGGTCGGTCTGTA GGG               |
|                     | NDM-1          | ATT AGC CGC TGC ATT GAT          | CAT GTC GAG ATAGGA AGT G          |
|                     | 16S rRNA       | GGGTTGCGCTCGTTGC                 | ATGGYTGTCGTCAGCTCGTG              |

Table S2 The abundance of each drug resistance gene in each group

| Types           | Different farms      |                      |                      |                      |                      |
|-----------------|----------------------|----------------------|----------------------|----------------------|----------------------|
|                 | BC                   | CC                   | CL                   | YJ                   | GZL                  |
| Aminoglycosides | $2.1 \times 10^{-3}$ | $2.9 \times 10^{-5}$ | $1.5 \times 10^{-3}$ | $5.1 \times 10^{-4}$ | $2.4 \times 10^{-4}$ |
| β-lactam        | $5.8 \times 10^{-5}$ | $7.3 \times 10^{-3}$ | $1.6 \times 10^{-4}$ | $1.2 \times 10^{-3}$ | $3.5 \times 10^{-5}$ |
| MLSb            | $2.5 \times 10^{-3}$ | $1.2 \times 10^{-3}$ | $5.5 \times 10^{-3}$ | $9.1 \times 10^{-3}$ | $2.3 \times 10^{-4}$ |
| Sulfonamides    | $1.6 \times 10^{-3}$ | $7.7 \times 10^{-6}$ | $2.8 \times 10^{-4}$ | $5.2 \times 10^{-4}$ | $7.1 \times 10^{-5}$ |
| Tetracyclines   | $9.7 \times 10^{-3}$ | $6.0 \times 10^{-2}$ | $2.8 \times 10^{-1}$ | $2.2 \times 10^{-1}$ | $1.7 \times 10^{-1}$ |
| int1            | $8.4 \times 10^{-4}$ | $4.1 \times 10^{-3}$ | $2.1 \times 10^{-3}$ | $1.4 \times 10^{-4}$ | $1.9 \times 10^{-4}$ |
| MCR-1           | $1.1 \times 10^{-7}$ | $4.0 \times 10^{-7}$ | $1.4 \times 10^{-6}$ | $2.7 \times 10^{-7}$ | $1.5 \times 10^{-6}$ |
| NDM-1           | $9.0 \times 10^{-9}$ | $4.6 \times 10^{-8}$ | $5.3 \times 10^{-7}$ | $1.1 \times 10^{-7}$ | $4.1 \times 10^{-8}$ |
| qnrA            | $8.2 \times 10^{-9}$ | 0                    | 0                    | $1.9 \times 10^{-7}$ | $2.0 \times 10^{-8}$ |
| qnrS            | $2.1 \times 10^{-6}$ | $2.2 \times 10^{-7}$ | $1.1 \times 10^{-6}$ | $9.8 \times 10^{-7}$ | $2.3 \times 10^{-7}$ |
